# Supplementary material
Source: publisher site journal article supplement (https://www.dovepress.com/article/275650)
Supplement: Supplementary file 1 [file get_supplementary_file.php]

Supplementary Table 1. The sequence of primers

| Genes | Primer sequence(5’-3’) | |
| --- | --- | --- |
| *VEGF* | F | AGGGCAGAATCATCACGAAGT |
| R | AGGGTCTCGATTGGATGGCA |
| *HIF-1α* | F | GAACGTCGAAAAGAAAAGTCTCG |
| R | CCTTATCAAGATGCGAACTCACA |
| *bFGF* | F | AGTGTGTGCTAACCGTTACCT |
| R | ACTGCCCAGTTCGTTTCAGTG |
| *PDGFRα* | F | AGCGCCGAAGTCCAGAAAAC |
| R | TACTCTCACGACAGTTGCCAT |
| *GAPDH* | F | ACAACTTTGGTATCGTGGAAGG |
| R | GCCATCACGCCACAGTTTC |
| *miR-21-5p* | F | GCAGTAGCTTATCAGACTGATG |
| R | GGTCCAGTTTTTTTTTTTTTTCAAC |
| *SPRY2* | F | CCTACTGTCGTCCCAAGACCT |
| R | GGGGCTCGTGCAGAAGAAT |
| *U6* | F | TGGAACGCTTCACGAATTTGCG |
| R | GGAACGATACAGAGAAGATTAGC |

Supplementary Figure S1


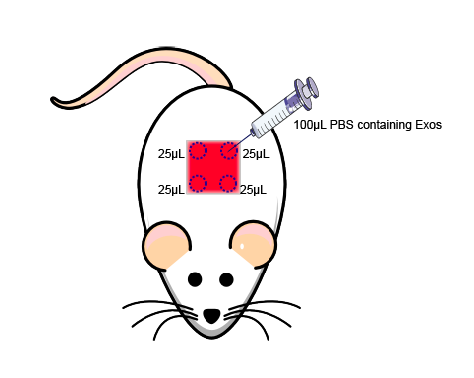


**Figure S1. The 4 injection sites were the four corners of the wound.** The rats were subcutaneously injected with 100 μl PBS, BMSC-Exos (100 μg dissolved in 100 μl PBS), and mag-BMSC-Exos (100 μg dissolved in 100 μl PBS) around the wounds at 4 injection sites (25 μl per site).

Supplementary Figure S2

**
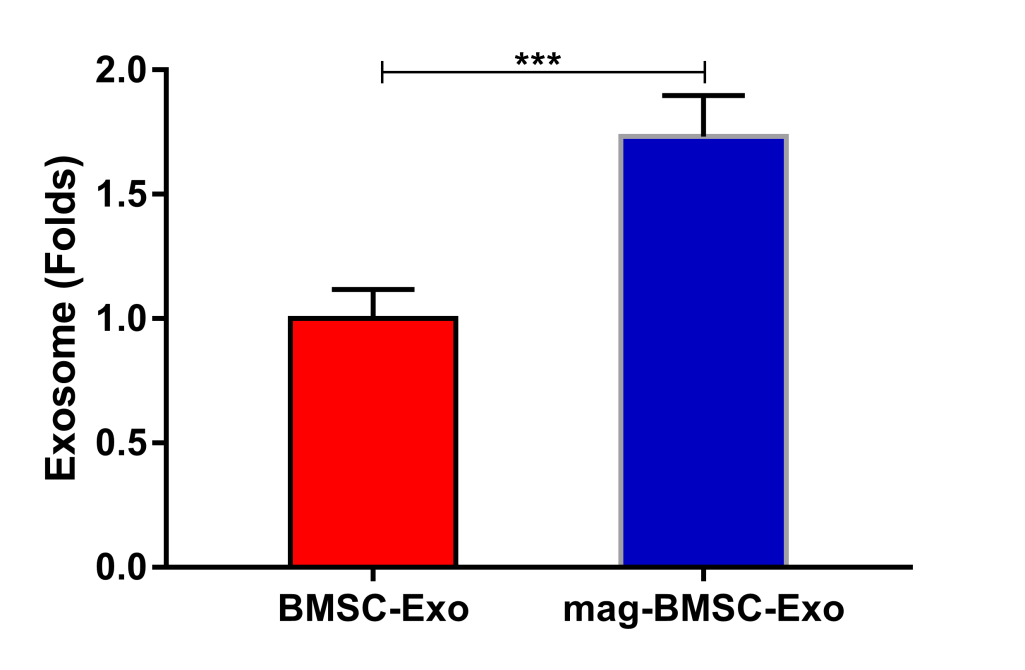
**

**Figure S2. Magnetic stimulation increased the production of exosomes in BMSCs. (***) p < 0.001.**

Supplementary Figure S3


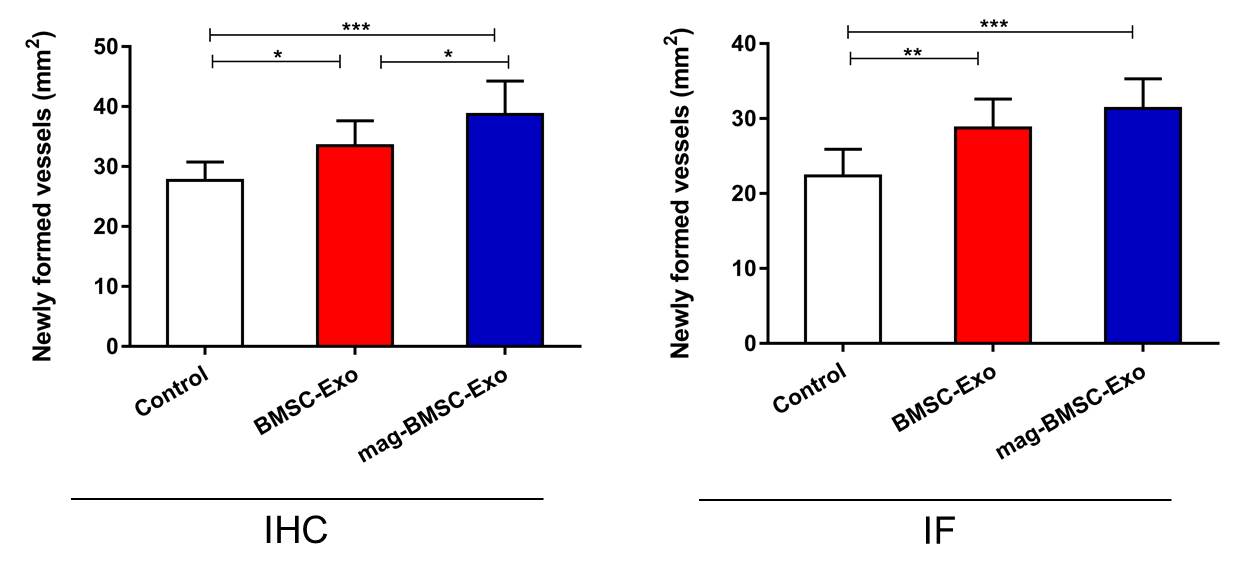


**Figure S3: IHC for CD31 and IF for CD31 of wound sections in the control, BMSC-Exo, and mag-BMSC-Exo groups on day 14 after wounding. (*) p < 0.05, (**) p < 0.01, (***) p < 0.001.** Quantitative determination of the number of blood vessels in these groups. Scale bar = 50 μm.

IHC: immunohistochemical staining; IF: immunofluorescence staining.

Supplementary Figure S4


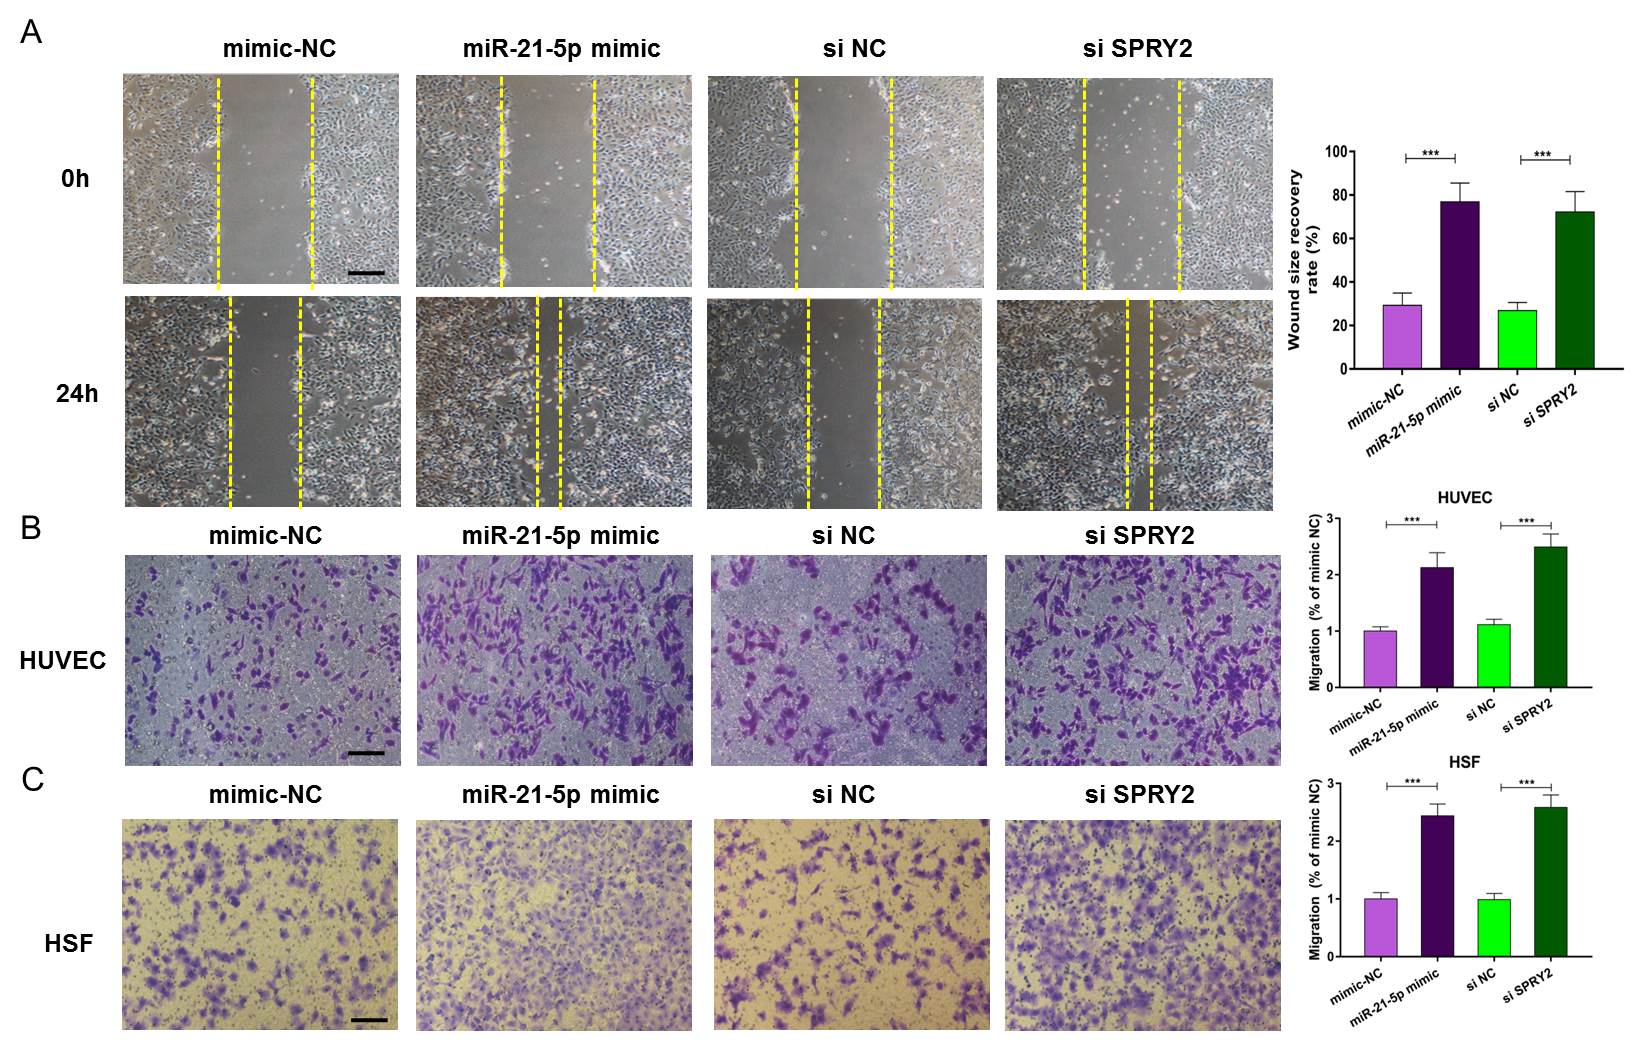


**Figure S4: Knocking down the expression of SPRY2 can achieve similar effects as miR-21-5p on angiogenesis and fibroblast function.** **(***) p < 0.001.** (A) Scratch wound assays showed the migration ability of HUVECs after transfection with miR-21-5p mimic, si-SPRY2 or their negative controls and quantitative analysis of the wound size recovery rate. (B, C) Transwell assays showed the migration ability of HUVECs and HSFs after transfection with miR-21-5p mimic, si SPRY2 or their negative controls and quantitative analysis of the migration rates. Scale bar = 200 μm.
